# Supplementary material
Source: Elsevier journal article supplement (https://www.sciencedirect.com/science/article/pii/S0213911119300378)
Supplement: mmc1 [file S0213911119300378:mmc1.docx]

**Tabla I**. Asociación entre las diferentes variables del estudio y la falta de adherencia a los consejos de cribado del cáncer ginecológico: estimaciones del modelo 5 multivariantea (n=8.944).

|  | **Citología** | **Mamografía** |
| --- | --- | --- |
| **Condición** |  |  |
| Autóctona | 1,00 | 1,00 |
| Inmigrante | 1,08 (0,77-1,52) | 1,62 (0,97-2,74) |
| **Edad** |  |  |
| <35 años | 1,00 | - |
| 35-49 años | 0,97 (0,80-1,18) | 1,00 |
| 50-64 años | 1,73 (1,10-2,14) | 0,77 (0,53-1,11) |
| ≥65 años | 2,98 (1,82-4,88) | 1,15 (0,77-1,72) |
| **Estado civil** |  |  |
| Soltera | 1,00 | 1,00 |
| Casada | 0,60 (0,50-0,71) | 0,58 (0,41-0,81) |
| Viuda | 0,80 (0,57-1,13) | 0,61 (0,40-0,93) |
| Separada / Divorciada | 0,58 (0,44-0,76) | 0,77 (0,49-1,20) |
| **Nivel socioeconómico** |  |  |
| Alto | 1,00 | 1,00 |
| Medio | 1,23 (1,00-1,51) | 1,14 (0,84-1,54) |
| Bajo | 1,86 (1,53-2,27) | 1,23 (0,92-1,66) |
| **Seguro sanitario** |  |  |
| Público | 1,00 | 1,00 |
| Privado | 0,65 (0,41-1,04) | 0,71 (0,37-1,35) |
| Ambos | 0,40 (0,31-0,50) | 0,66 (0,48-0,93) |
| Ninguno | 3,97 (0,66-23,76) | 11,44 (1,01-129,2) |
| **Estado de salud percibido** |  |  |
| Muy bueno / Bueno | 1,00 | 1,00 |
| Regular | 0,97 (0,80-1,16) | 1,08 (0,84-1,40) |
| Malo / Muy malo | 1,16 (0,87-1,54) | 1,20 (0,86-1,67) |
| **Morbilidad crónica** |  |  |
| Cardiovasculares | 0,89 (0,76-1,05) | 1,07 (0,86-1,33) |
| Respiratorias | 0,90 (0,76-1,08) | 1,22 (0,96-1,57) |
| Osteoarticulares | 0,86 (0,74-1,01) | 0,73 (0,58-0,92) |
| Digestivas | 0,77 (0,60-0,98) | 0,87 (0,65-1,18) |
| Mentales | 1,13 (0,94-1,38) | 0,97 (0,75-1,26) |
| Otras | 0,90 (0,77-1,05) | 0,95 (0,76-1,18) |
| **Soporte social** |  |  |
| Alto | 1,00 | 1,00 |
| Bajo | 1,81 (1,28-2,57) | 0,98 (0,60-1,59) |
| **Tiempo en España** |  |  |
| ≤ 5 años | 1,00 | 1,00 |
| 6-10 años | 0,98 (0,58-1,62) | 0,23 (0,77-0,69) |
| >10 años | 0,76 (0,45-1,28) | 0,11 (0,04-0,30) |

a ORs (IC95%) ajustadas por condición (autóctona, inmigrante), edad (<35, 35-49, 50-64, ≥65 años), estado civil (soltera, casada, viuda, separada / divorciada) y nivel socioeconómico (alto, medio, bajo), seguro sanitario (público, privado, ambos, sin seguro), enfermedad crónica (cardiovascular, respiratoria, osteorticular, digestiva, mental, otra) y estado de salud percibido (muy bueno / bueno, regular, malo / muy malo), soporte social percibido (bajo, alto) y tiempo de residencia en España (<5, 5-10, >10 años).
